# Supplementary material
Source: PubMed Central journal article supplement (PMC3989392)
Supplement: NIHMS569143-supplement-253_2014_5552_MOESM1_ESM.pdf [file NIHMS569143-supplement-253_2014_5552_MOESM1_ESM.pdf]

O-antigen Polymerase Adopts a Distributive Mechanism for Lipopolysaccharide Biosynthesis

Guohui Zhao, Baolin Wu, Lei Li, Peng George Wang

Center for Diagnostics and Therapeutics and Department of Chemistry, Georgia State University, Atlanta, GA 30303, USA

To whom correspondence should be addressed: Peng George Wang, Phone: (404) 413-3591. E-mail: [pwang11@gsu.edu](mailto:pwang11@gsu.edu)

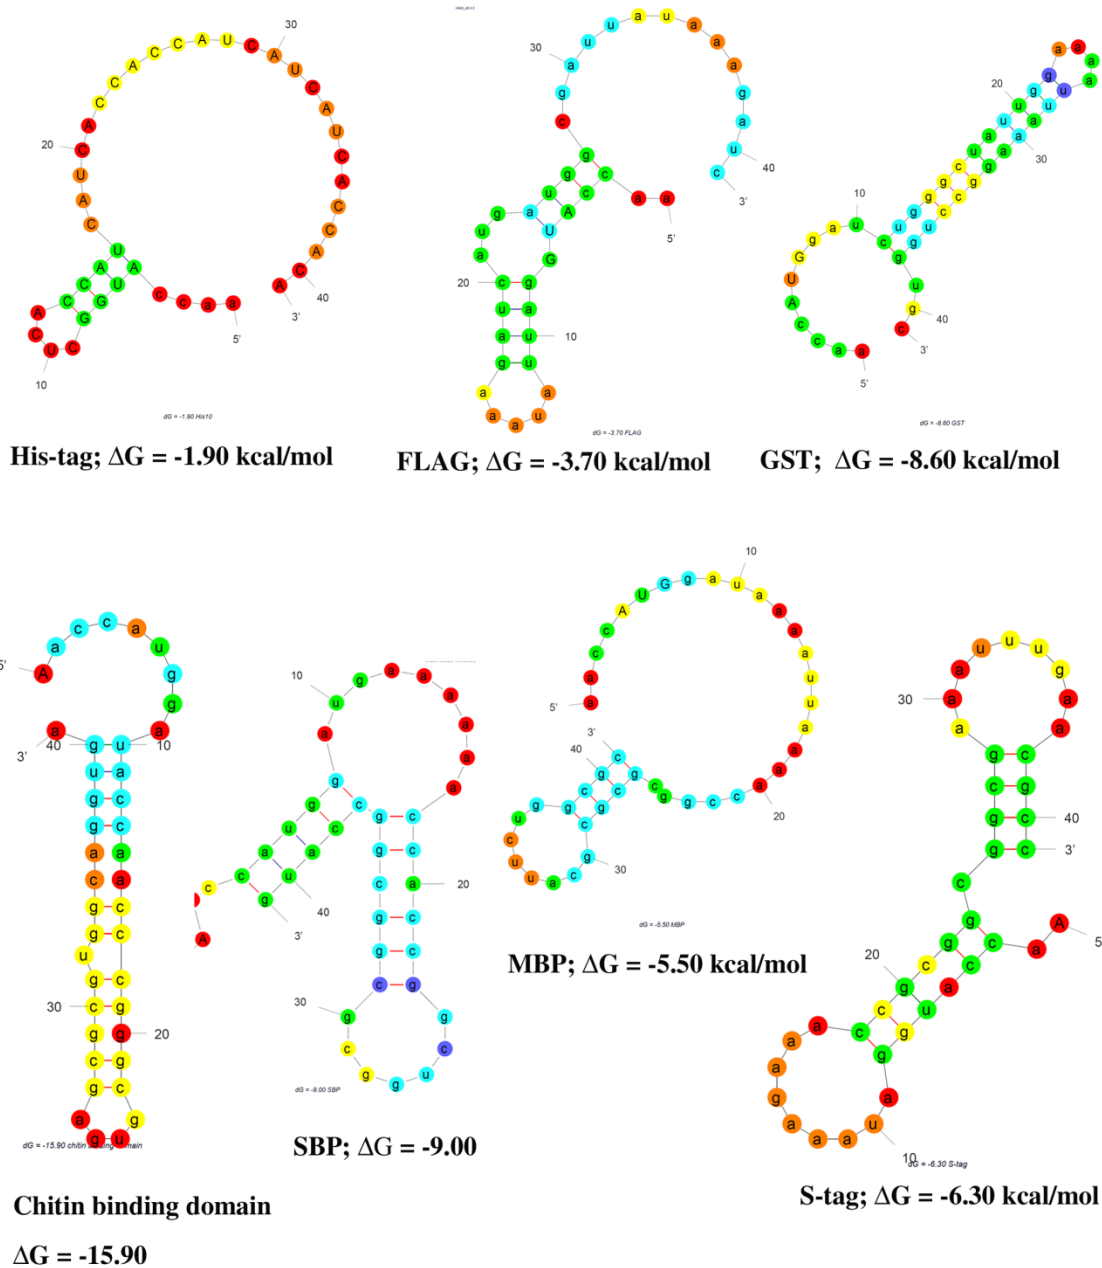

Figure S1. The mRNA structure of the nucleotides (-4 to +37) and their corresponding folding free energy which is calculated by mfold web server. All the genes are supported to be inserted into *Nco*I restriction site on pBAD/myc-his A plasmid.

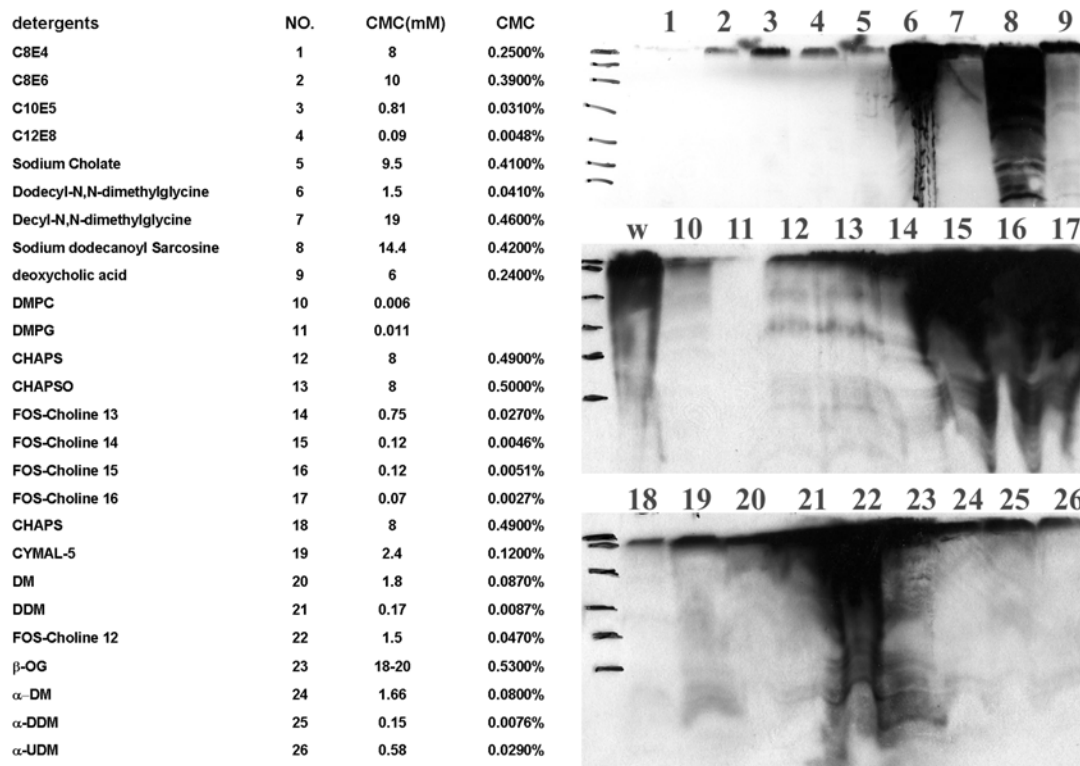

Figure S2. The initial screening using twenty-six detergents and the detection of His-tagged Wzy by western blot. In most cases, Wzy form the aggregates. The possible candidate detergents were selected on the basis of the western signal even the proteins may be aggregates.

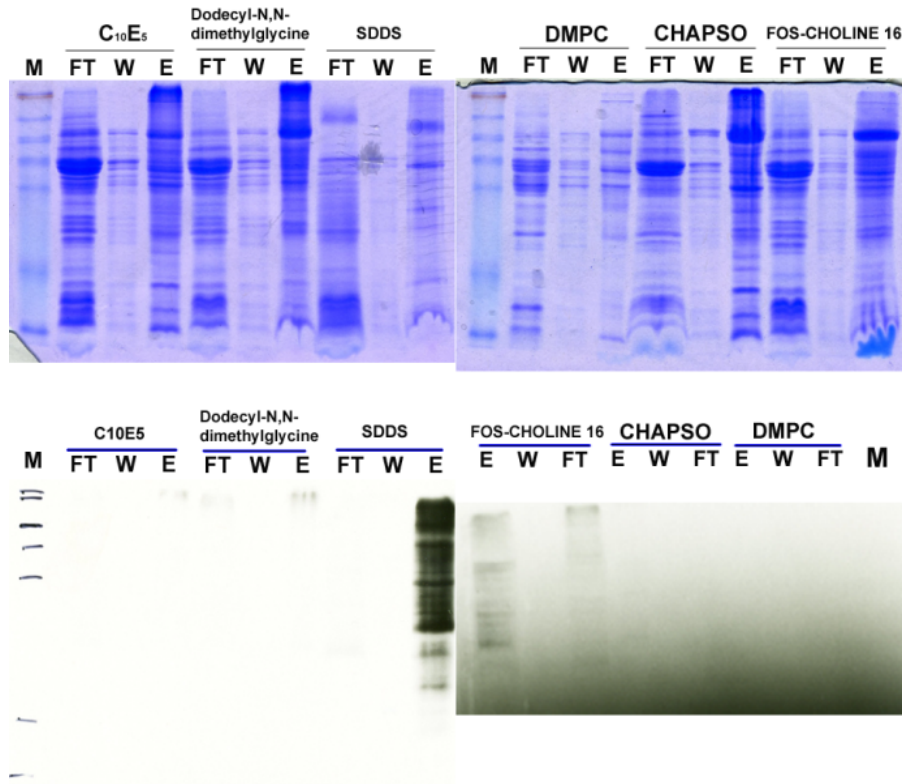

Figure S3. The 2<sup>nd</sup> detergents screening and visualization of Wzy by SDS-PAGE and Western blot.

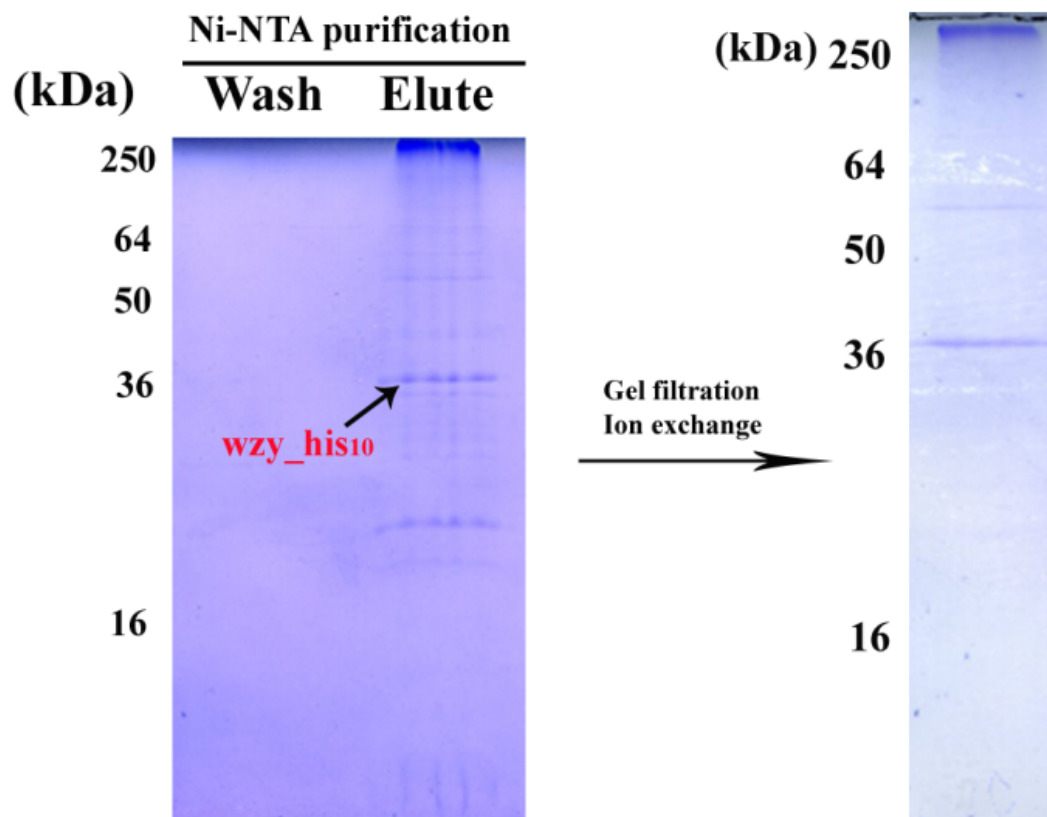

Figure S4. The expression and purification of Wzy with C-terminal histidine tag.

RU-PP-Undecaprenyl: LRMS ( $m/z$ ): [M-2H]<sup>2-</sup> calcd. for C<sub>89</sub>H<sub>146</sub>N<sub>2</sub>O<sub>31</sub>P<sub>2</sub>, 900.5; found, 900.4.

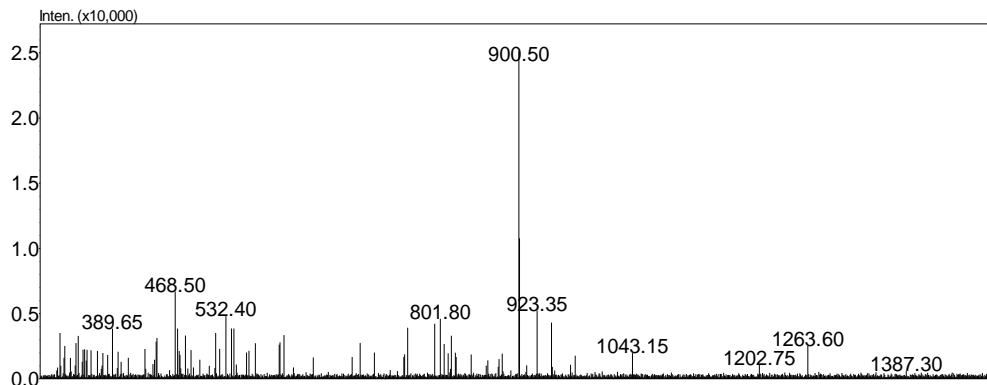

RU-PP-cis-Pentaprenyl: LRMS ( $m/z$ ): [M-H]<sup>-</sup> calcd. for C<sub>59</sub>H<sub>99</sub>N<sub>2</sub>O<sub>31</sub>P<sub>2</sub>, 1393.6; found, 1393.5.

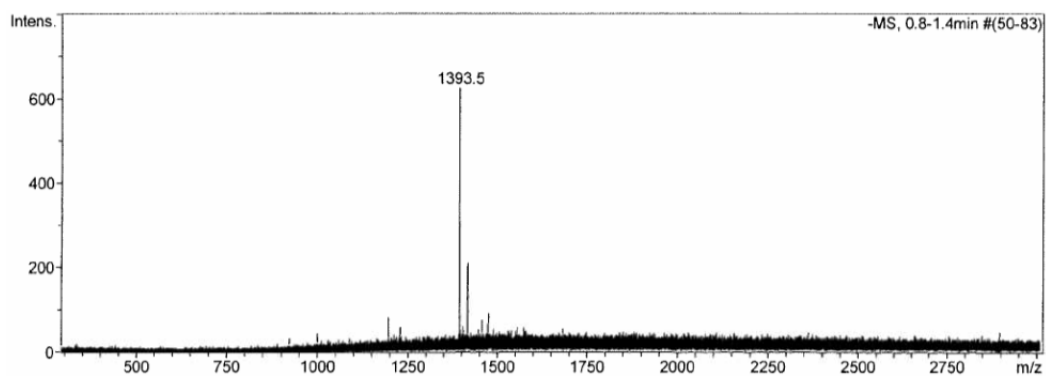

RU-PP-MS-Pentaprenyl: LRMS ( $m/z$ ): [M-2H]<sup>2-</sup> calcd. for C<sub>59</sub>H<sub>100</sub>N<sub>2</sub>O<sub>31</sub>P<sub>2</sub>, 697.3; found, 697.3.

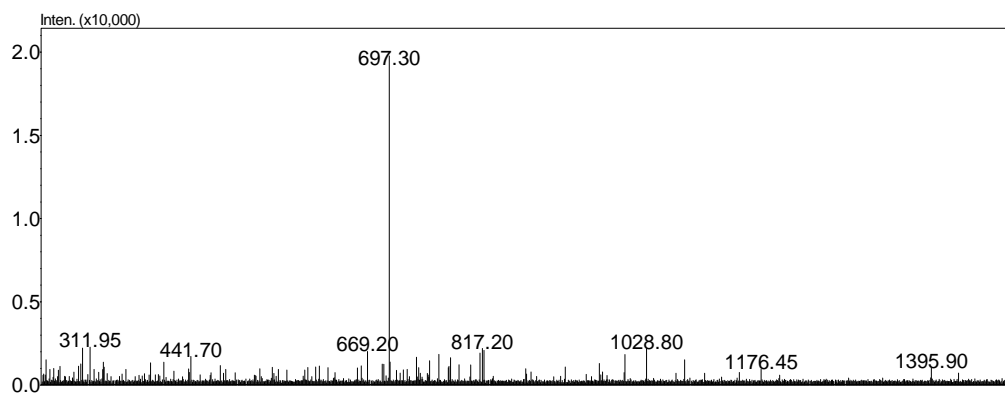

Figure S5. Determination of synthetic RU-PP-lipid with mass spec

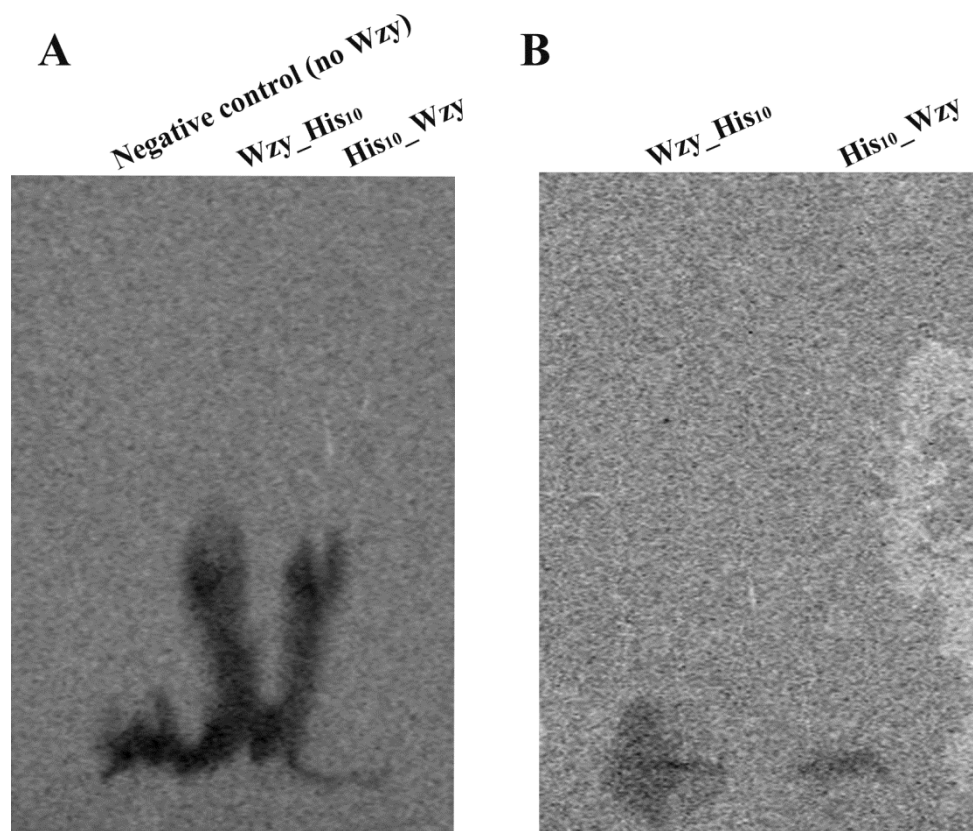

Figure S6. Determination of Wzy activity using radio-labelled substrate. A. cis-pentaprenol-PP linked RU can be polymerized by Wzy; (B) MS-pentaprenol-PP linked RU could not be polymerized by Wzy.

**A Wet Membrane transferring System**

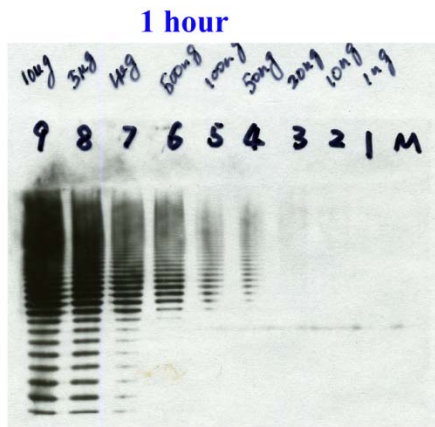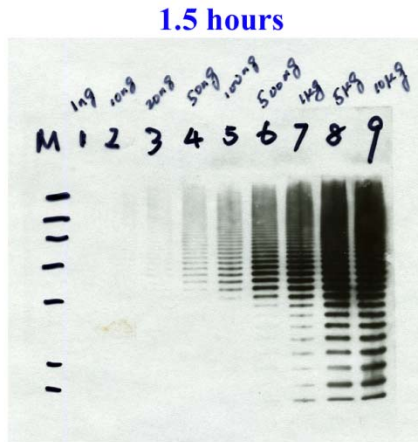

**B Dry Membrane transferring system**

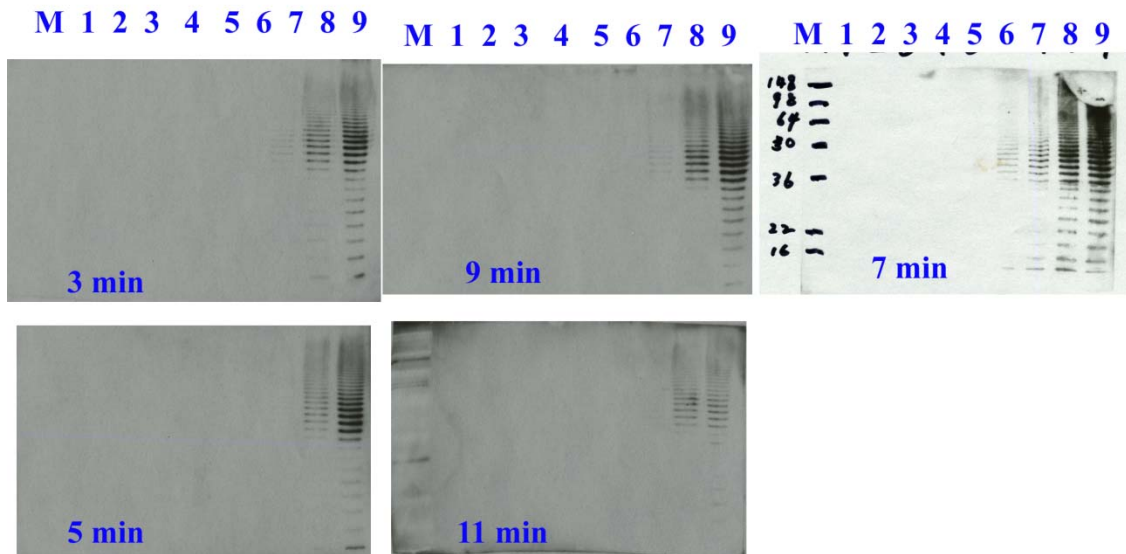

Figure S7. The detect limit comparison of two commonly used Western blot system. The results show that wet transfer is ten times higher on efficiency than semi-dry transfer. It further shows that transfer time has little effect on the results, especially for the dry transfer. However, longer time (1.5 hours vs 1 hour) can improve the wet transfer efficiency to some extent.



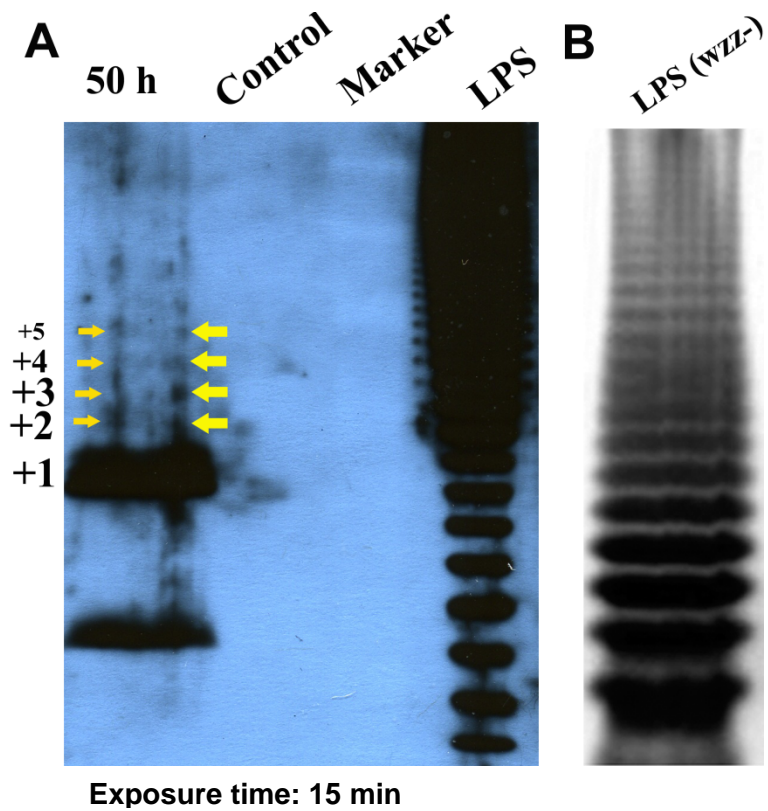

Figure S8. (A). The Wzy reaction after 50 hours. Some low Mw bands form with very low concentration; (B) LPS from *E. coli* O86 wzz KO strain. It seems that the product accumulated on the both sides of the lane as labeled by yellow arrows.

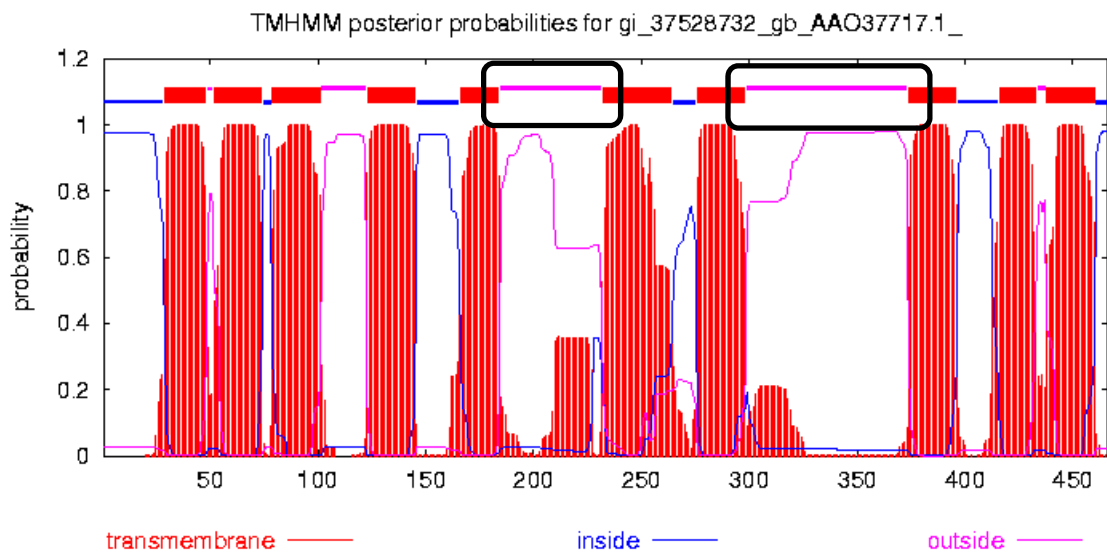

Figure S9 The Wzy secondary structure. The largest two loops are highlighted in black boxes, which are located in the periplasmic domain (shown as outside) and suggested to be essential in Wzy function.

Table S1. The detergents used in membrane protein solubilization screening

| Ionic detergents               | non-ionic detergetns           | Zwitterionic detergents | synthetic lipids |
|--------------------------------|--------------------------------|-------------------------|------------------|
| Sodium cholate                 | DDM                            | FOS-CHOLINE-13          | DMPC             |
| n-Dodecyl-N,N-dimethylglycine  | DM                             | FOS-CHOLINE-14          | DMPG             |
| n-Decyl-N,N-dimethylglycine    | b-OG                           | FOS-CHOLINE-15          |                  |
| Sodium dodecanoyl sarcosine    | UM                             | FOS-CHOLINE-16          |                  |
| Deoxycholic acid (sodium salt) | CYMAL-5                        | CHAPS                   |                  |
|                                | C <sub>8</sub> E <sub>4</sub>  | CHAPSO                  |                  |
|                                | C <sub>8</sub> E <sub>6</sub>  |                         |                  |
|                                | C <sub>10</sub> E <sub>5</sub> |                         |                  |
|                                | C <sub>12</sub> E <sub>8</sub> |                         |                  |
